# Supplementary material for: Analyzing the chemical composition, morphology, and size of ice-nucleating particles by coupling a scanning electron microscope to an offline diffusion chamber
Source: Copernicus journal article supplement (doi:10.5194/amt-18-5223-2025), 2025-10-10
Supplement: Supplementary file 1 [file amt-18-5223-2025-supplement.pdf]

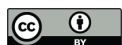

## *Supplement of*

# **Analyzing the chemical composition, morphology, and size of ice-nucleating particles by coupling a scanning electron microscope to an offline diffusion chamber**

**Lisa Schneider et al.**

*Correspondence to:* Martin Ebert ([mebert@geo.tu-darmstadt.de](mailto:mebert@geo.tu-darmstadt.de))

The copyright of individual parts of the supplement might differ from the article licence.

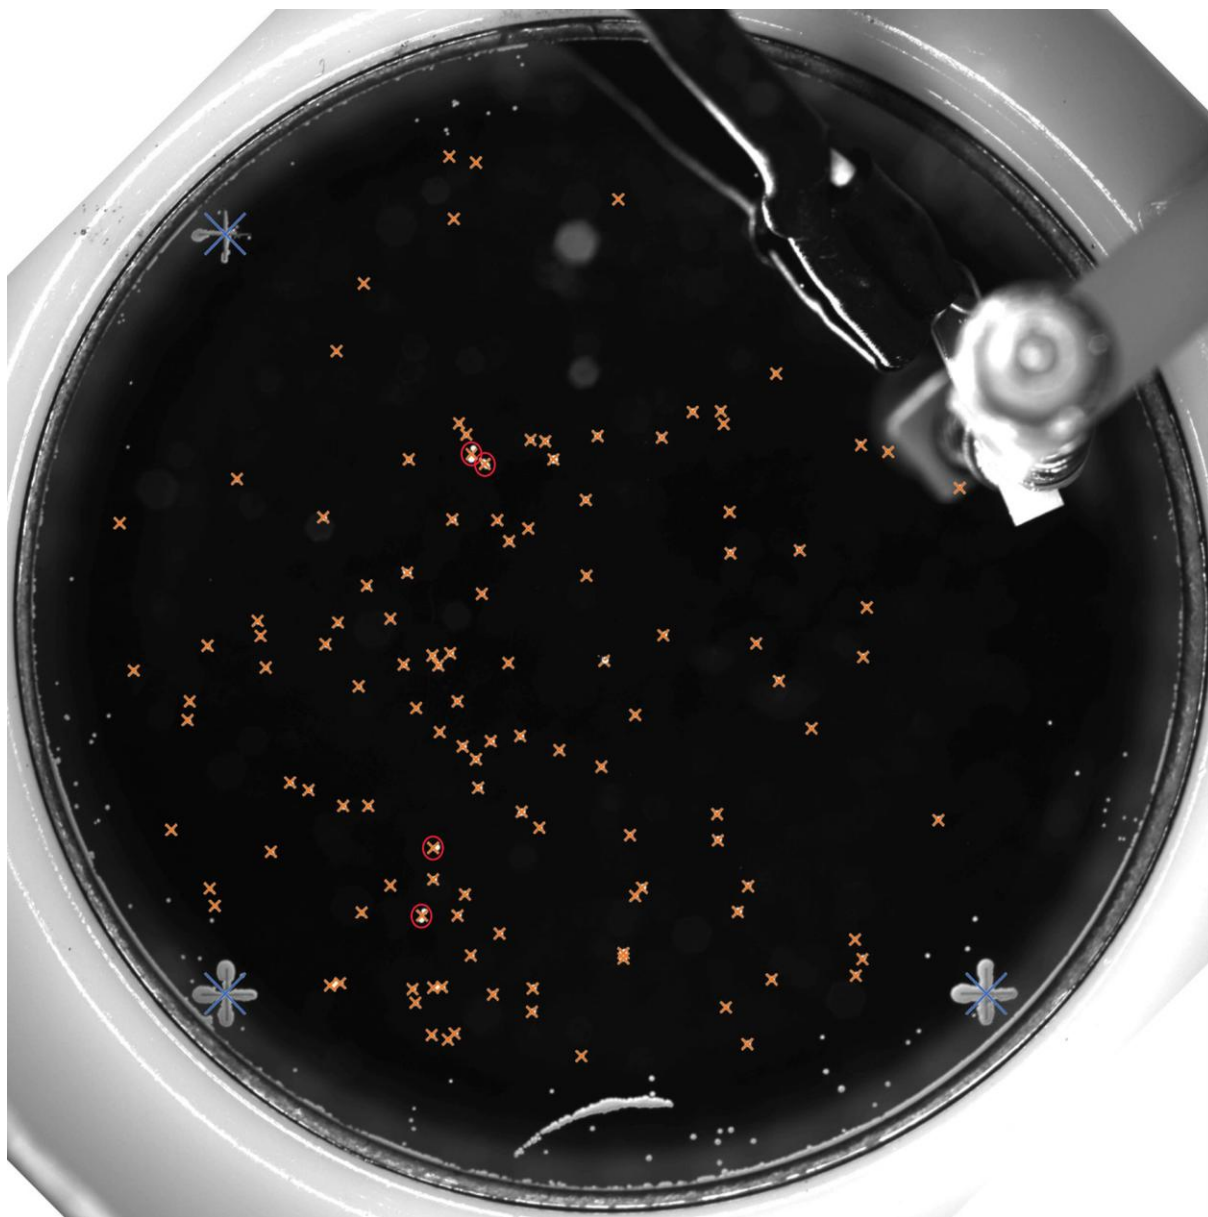

**Figure S1:** Image of a silicon wafer from the FRIDGE diffusion chamber measurement with grown ice crystals (white dots) and the corresponding calculated positions for SEM (orange crosses). Miscalculated coordinates are marked with a red circle. The three laser-engraved crosses (large blue crosses) represent the reference points for the coordinate system. The edge of the sample substrate as well as the area around the temperature sensor are excluded from analysis.

a)

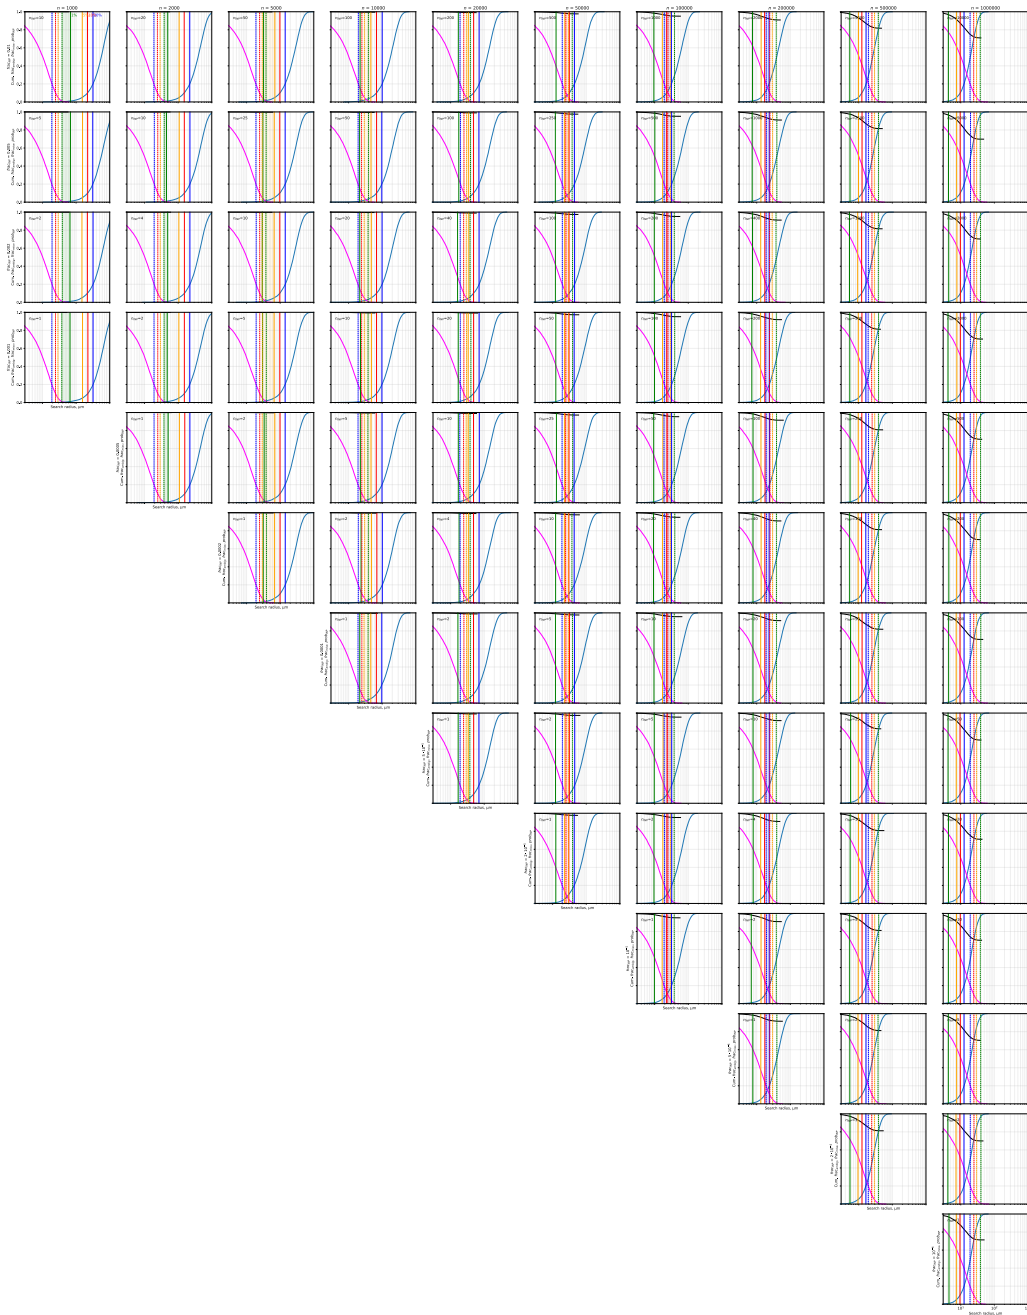

b)

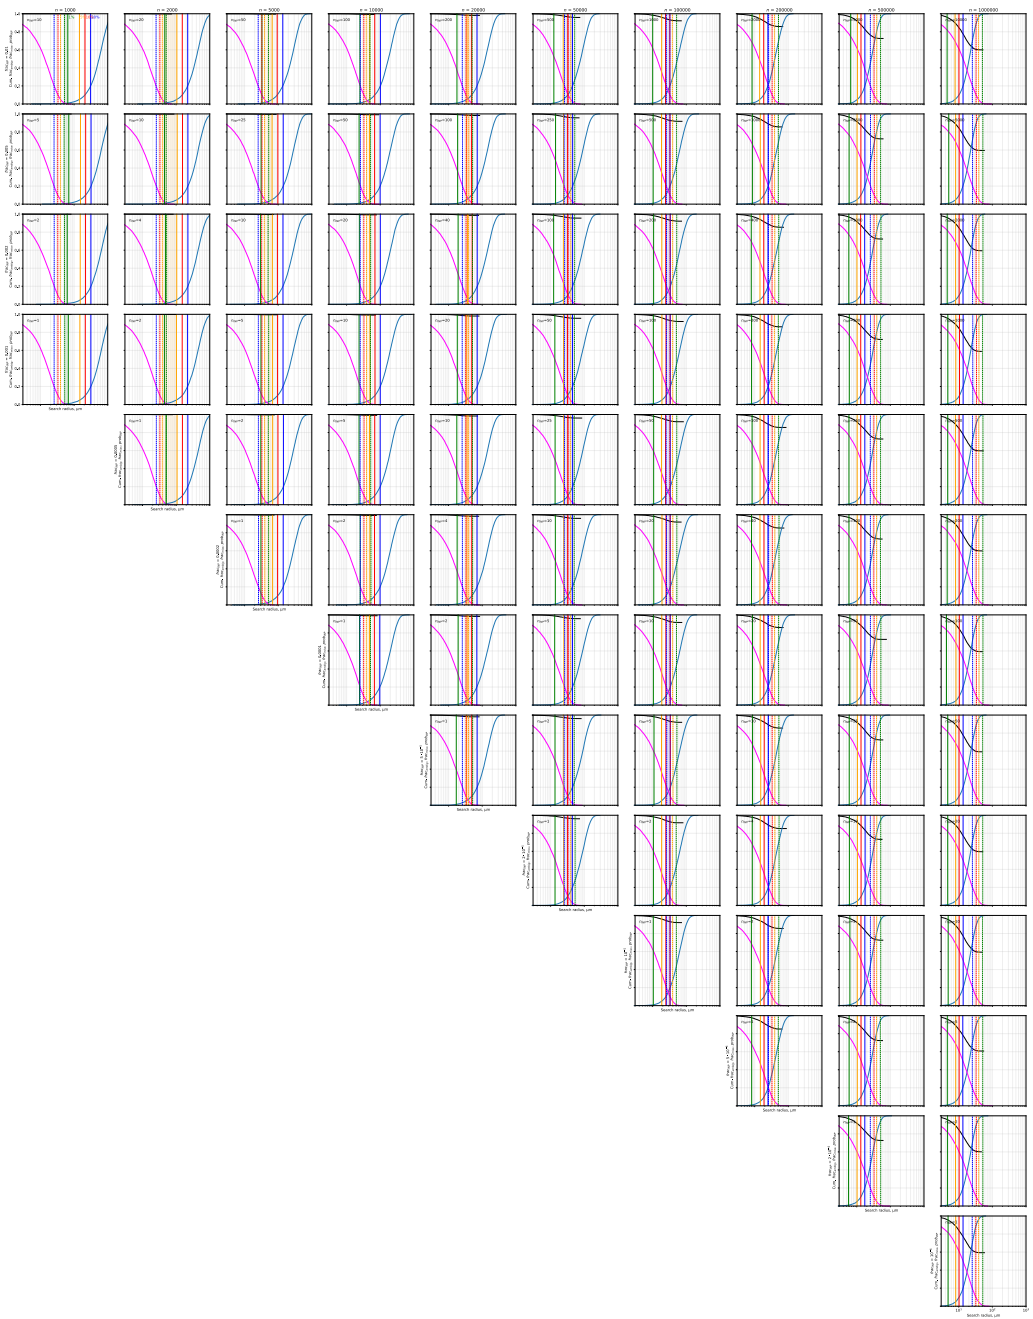

c)

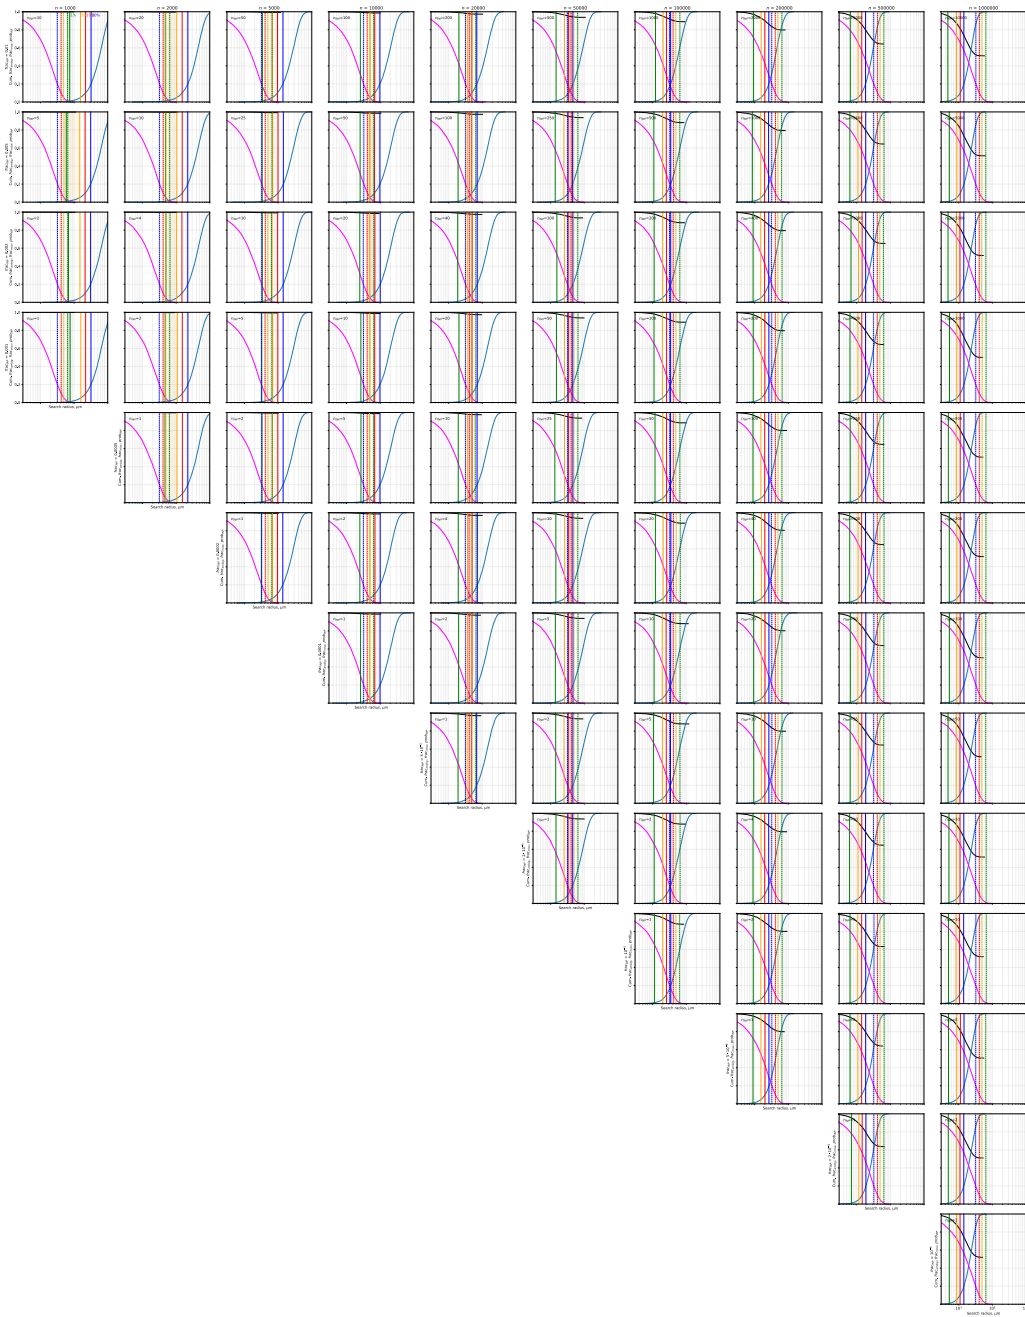

d)

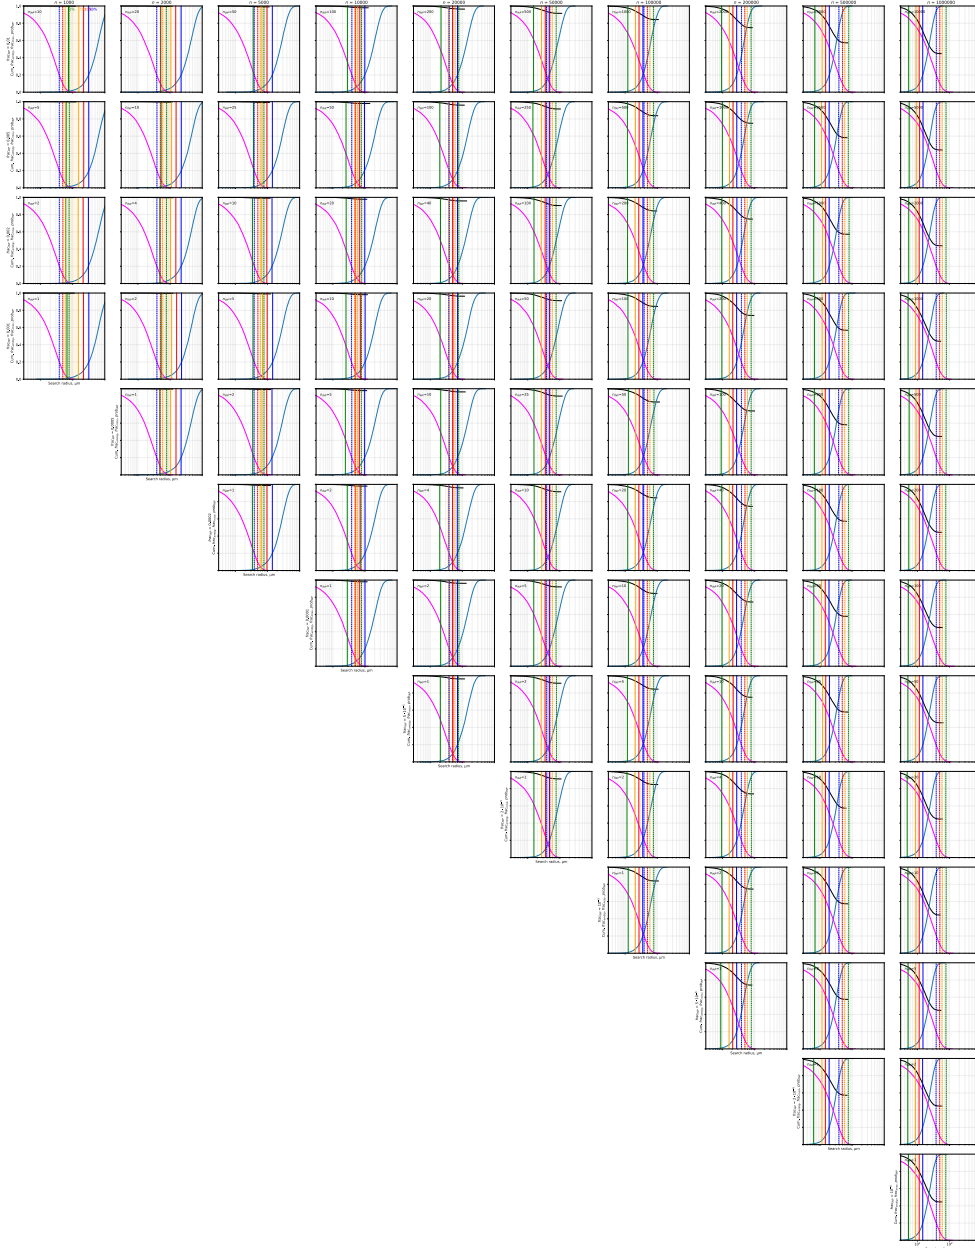

**Figure S2: Model simulation results.** Cumulative fraction of unrecovered particles  $frac_{miss}$  (pink line), fraction of ambiguous locations  $frac_{ambig}$  (blue), and fraction of correctly identified INP  $prob_{INP}$  (thin black) as function of search radius for different INP fraction  $frac_{INP}$  and total particle numbers  $n$ . For this plot, a standard deviation of the positioning uncertainty of a) 15  $\mu\text{m}$ , b) 20  $\mu\text{m}$ , c) 25  $\mu\text{m}$  and d) 30  $\mu\text{m}$  is used. The total number of INP  $n_{INP}$  is shown for each plot. The search radius where 20% (blue), 10% (red), 5% (orange) and 1% (green) fraction / probability is reached is marked by vertical lines for  $frac_{miss}$  (broken line) and for  $frac_{ambig}$  (solid line). The lowest possible error probability range is indicated by a shaded area for below 20% (blue), below 10% (red), below 5% (orange) and below 1% (green). If no shaded area is visible, the error probability is greater than 20%.

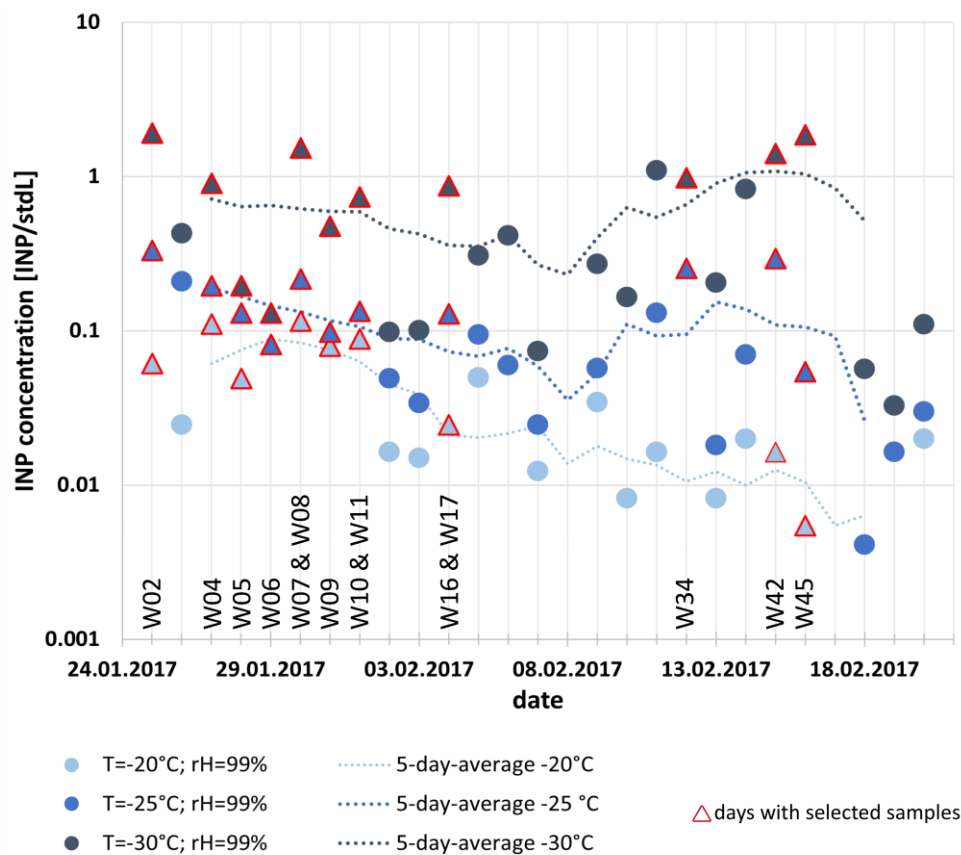

**Figure S3: INP concentrations (deposition nucleation / condensation mode freezing) calculated from the FRIDGE measurements at RH = 99 %. The concentration for each sample is calculated on the basis of one measurement. For days with more than one sample, an average value was calculated. Days with analyzed samples are indicated by triangles and the corresponding sample numbers. The 5-day running average concentration is shown by the dotted lines (the figure is adapted from Weber (2019)). The error of the concentrations given here is 20% approx., based on the relative error of the counting uncertainty for individual measurements from Schrod et al. (2016).**

Table S1: 0.95 confidence intervals for the chemical composition shown in Fig. 11, calculated by bootstrapping assuming multinominal distribution (Sison and Glatz, 1995). R (R Core Team, 2021) with the package DescTools (Signorell et mult. al., 2021) was used for calculation.

|                            | total |       | non SDE |       | SDE   |       |
|----------------------------|-------|-------|---------|-------|-------|-------|
|                            | lower | upper | lower   | upper | lower | upper |
| aluminosilicates / Al-rich | 0.432 | 0.567 | 0.295   | 0.464 | 0.643 | 0.83  |
| carbonates                 | 0.03  | 0.165 | 0.023   | 0.192 | 0     | 0.187 |
| silicon dioxide            | 0     | 0.105 | 0       | 0.123 | 0     | 0.144 |
| biological                 | 0     | 0.05  | 0       | 0.107 | 0     | 0.101 |
| soot                       | 0     | 0.08  | 0       | 0.092 | 0     | 0.13  |
| C-rich                     | 0.05  | 0.185 | 0.085   | 0.255 | 0     | 0.13  |
| metal oxides               | 0     | 0.115 | 0       | 0.154 | 0     | 0.116 |
| sulfates                   | 0     | 0.09  | 0       | 0.115 | 0     | 0.116 |
| mixtures                   | 0.06  | 0.195 | 0.101   | 0.27  | 0     | 0.13  |
| no classification possible | 0     | 0.115 | 0       | 0.146 | 0     | 0.13  |



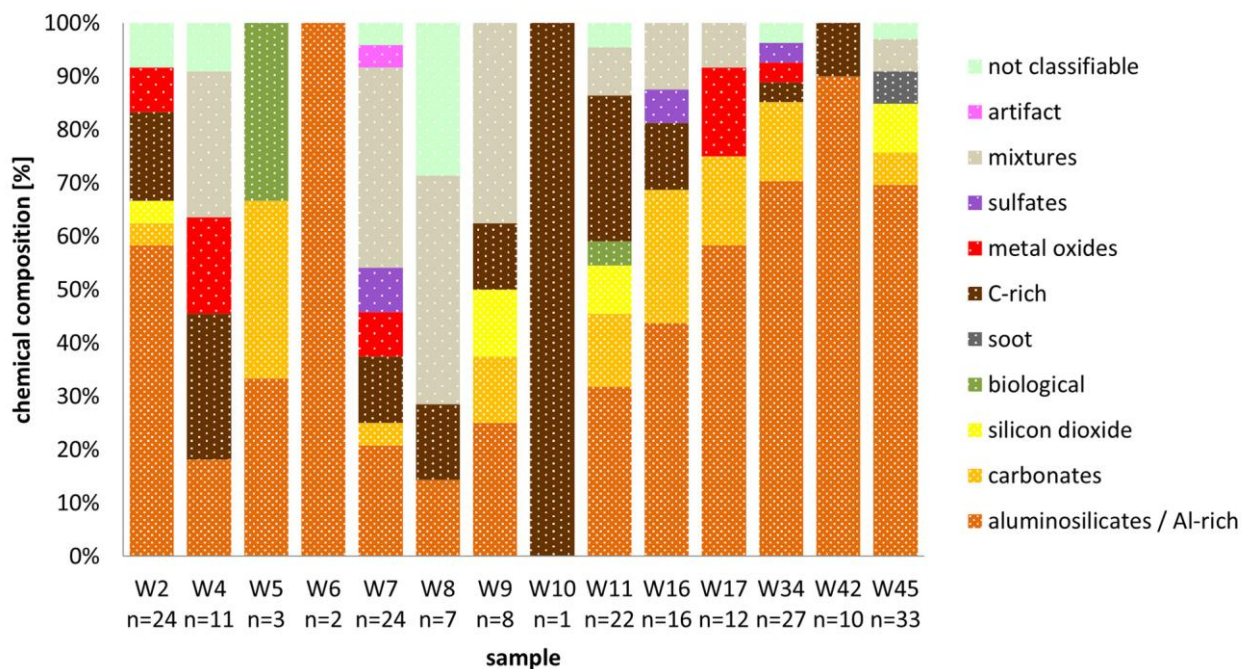

**Figure S4:** Chemical composition of individual samples from CLACE/INUIT 2017 at the high-altitude research station Jungfraujoch (activated at  $T = -30^{\circ}\text{C}$  and  $\text{RH} = 99 / 101 \%$ ;  $\text{RH} = 95 / 97\%$  was chosen for W16 due to cluster formation at higher RH) with the number of particles identified per sample (n).

**Table S2: 0.95 confidence intervals for the chemical composition shown in Fig. 12, calculated by bootstrapping assuming multinominal distribution (Sison and Glatz, 1995). R (R Core Team, 2021) with the package DescTools (Signorell et mult. al., 2021) was used for calculation.**

|                                   | 0.3 - 0.5 $\mu\text{m}$ |        | 0.5 – 1 $\mu\text{m}$ |        | 1 – 2 $\mu\text{m}$ |       | 2 – 3 $\mu\text{m}$ |       | 3 – 4 $\mu\text{m}$ |       |
|-----------------------------------|-------------------------|--------|-----------------------|--------|---------------------|-------|---------------------|-------|---------------------|-------|
|                                   | lower                   | upper  | lower                 | upper  | lower               | upper | lower               | upper | lower               | upper |
| <b>aluminosilicates / Al-rich</b> | 0                       | 0.513  | 0.1773                | 0.86   | 0.342               | 0.783 | 0.361               | 0.9   | 0.326               | 0.874 |
| <b>carbonates</b>                 | 0                       | 0      | 0                     | 0.166  | 0                   | 0.272 | 0                   | 0.278 | 0                   | 0.15  |
| <b>silicon dioxide</b>            | 0                       | 0.9514 | 0                     | 0      | 0                   | 0.131 | 0                   | 0.178 | 0                   | 0     |
| <b>biological</b>                 | 0                       | 0      | 0                     | 0      | 0                   | 0     | 0                   | 0     | 0                   | 0     |
| <b>soot</b>                       | 0                       | 0      | 0                     | 0.166  | 0                   | 0     | 0                   | 0     | 0                   | 0     |
| <b>C-rich</b>                     | 0                       | 0.513  | 0                     | 0.3907 | 0                   | 0.272 | 0                   | 0     | 0                   | 0.232 |
| <b>metal oxides</b>               | 0                       | 0.763  | 0                     | 0.3257 | 0                   | 0.131 | 0                   | 0     | 0                   | 0     |
| <b>sulfates</b>                   | 0                       | 0      | 0                     | 0      | 0                   | 0     | 0                   | 0.278 | 0                   | 0.15  |
| <b>mixtures</b>                   | 0                       | 0      | 0                     | 0.166  | 0                   | 0.206 | 0                   | 0.278 | 0.001               | 0.479 |
| <b>no classification possible</b> | 0                       | 0      | 0                     | 0.3257 | 0                   | 0.084 | 0                   | 0     | 0                   | 0     |

|                                   | 4 – 5 $\mu\text{m}$ |       | 5 – 6 $\mu\text{m}$ |        | 6 - 34.3 $\mu\text{m}$ |       | size not meas. |       |
|-----------------------------------|---------------------|-------|---------------------|--------|------------------------|-------|----------------|-------|
|                                   | lower               | upper | lower               | upper  | lower                  | upper | lower          | upper |
| <b>aluminosilicates / Al-rich</b> | 0.078               | 0.745 | 0                   | 0.0769 | 0.273                  | 0.727 | 0              | 0     |
| <b>carbonates</b>                 | 0                   | 0.336 | 0                   | 0.507  | 0                      | 0.285 | 0              | 0     |
| <b>silicon dioxide</b>            | 0                   | 0.218 | 0                   | 0      | 0                      | 0     | 0              | 0     |
| <b>biological</b>                 | 0                   | 0     | 0                   | 0      | 0                      | 0.154 | 0              | 0     |
| <b>soot</b>                       | 0                   | 0     | 0                   | 0      | 0                      | 0     | 0              | 0.513 |
| <b>C-rich</b>                     | 0                   | 0.336 | 0                   | 0.333  | 0                      | 0.323 | 0              | 0.513 |
| <b>metal oxides</b>               | 0                   | 0.336 | 0                   | 0      | 0                      | 0     | 0              | 0     |
| <b>sulfates</b>                   | 0                   | 0     | 0                   | 0.333  | 0                      | 0     | 0              | 0     |
| <b>mixtures</b>                   | 0                   | 0.435 | 0                   | 0.648  | 0                      | 0.323 | 0              | 0     |
| <b>no classification possible</b> | 0                   | 0     | 0                   | 0      | 0                      | 0     | 0.38           | 1     |

## References:

R Core Team: R: A language and environment for statistical computing, R Foundation for Statistical Computing, Vienna, Austria, 2021 URL: <https://www.R-project.org/>

Signorell, A. et mult. al.: Desc Tools: Tool for descriptive statistics, R package version 0.99.44, 2021

Sison, C. P. and Glaz, J.: Simultaneous Confidence Intervals and Sample Size Determination for Multinomial Proportions, Journal of the American Statistical Association, 90, 366-369, doi: 10.1080/01621459.1995.10476521, 1995
